# Supplementary material
Source: Springer Nature journal article supplement (https://www.springermedizin.de/resource/supplementary/12943_2009_538_MOESM7_ESM.pdf/9554726)

### A

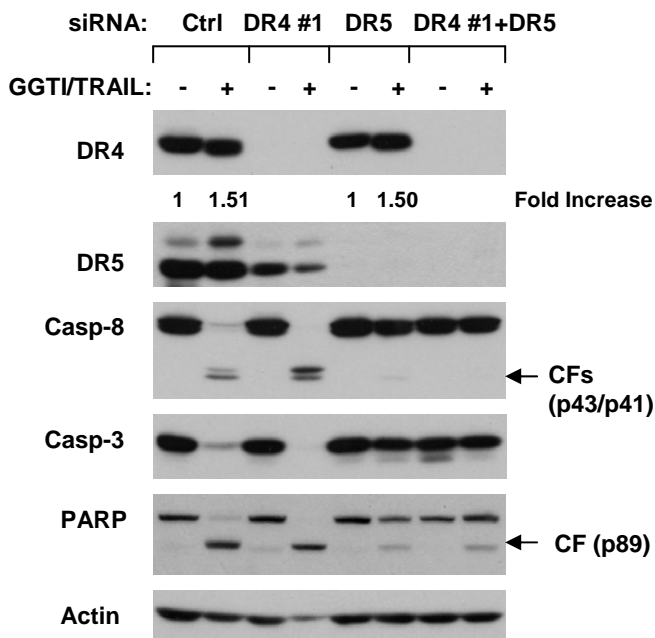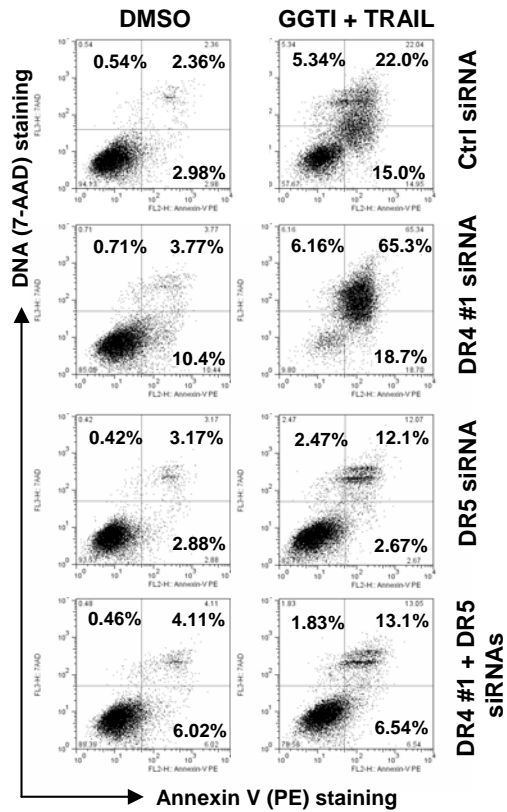

### B

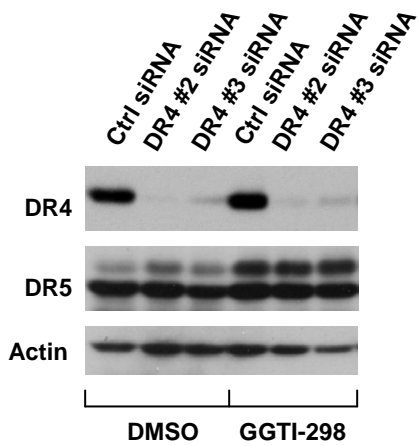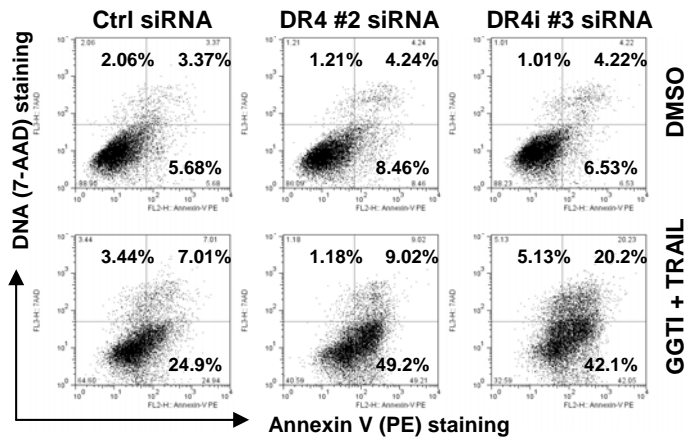

### C

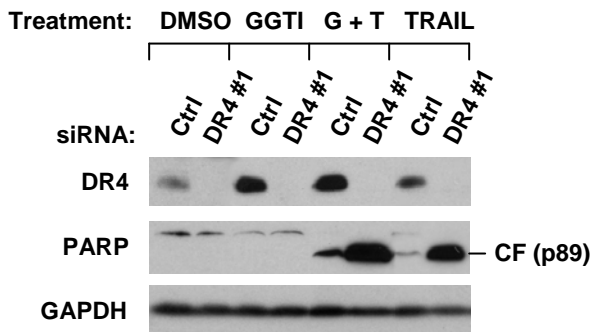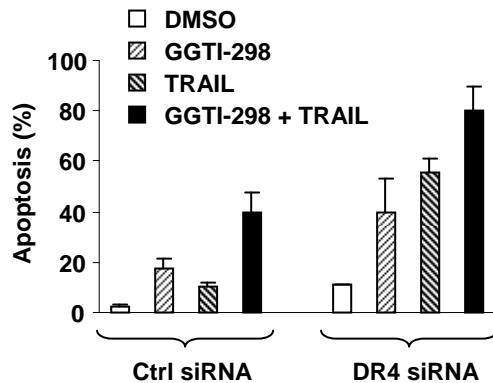

Supplement: MOESM7 [file 9554726]
